# Supplementary material
Source: MDPI journal article supplement (https://www.mdpi.com/2311-7524/8/7/643)
Supplement: s1 [file s1]

**Table S1. Primers used for genes isolation.**

| Gene              | Methods used                | Primer (5'-3')                                         |
|-------------------|-----------------------------|--------------------------------------------------------|
| <i>EVM0031008</i> | SK vector construction (FP) | AGGACAGCCCAAGCTGAGCTC<br>ATGCAAGATATACATTCAATTGG       |
| <i>EVM0031008</i> | SK vector construction (RP) | TTCCTGCAGCCCCGGGGGATCC<br>TTAGGGGGGATACAGAGAGTTAT<br>C |
| <i>EVM0019694</i> | SK vector construction (FP) | AGGACAGCCCAAGCTGAGCTC<br>ATGTATGATCCGACGATGCAGTG       |
| <i>EVM0019694</i> | SK vector construction (RP) | TTCCTGCAGCCCCGGGGGATCC<br>TCAGATTTTCATAGGCCGACTGATC    |
| <i>EVM0011284</i> | SK vector construction (FP) | AGGACAGCCCAAGCTGAGCTC<br>ATGGTTTTTTCATCCATTCCAGC       |
| <i>EVM0011284</i> | SK vector construction (RP) | TTCCTGCAGCCCCGGGGGATCC<br>TCATAAGGGAGTACTAGTGGAAG      |
| <i>EVM0025419</i> | SK vector construction (FP) | AGGACAGCCCAAGCTGAGCTC<br>ATGCTGGGAAACTGTGAGAAGAT<br>G  |
| <i>EVM0025419</i> | SK vector construction (RP) | TTCCTGCAGCCCCGGGGGATCC<br>CTAGATCAGAGAAGGGACAGAAG      |
| <i>EVM0003933</i> | SK vector construction (FP) | AGGACAGCCCAAGCTGAGCTC<br>ATGGGTTTGAGCAAGAGACAGG        |
| <i>EVM0003933</i> | SK vector construction (RP) | TTCCTGCAGCCCCGGGGGATCC<br>TTAGGCTTTATGATGATCCCATG      |
| <i>EVM0024406</i> | SK vector construction (FP) | AGGACAGCCCAAGCTGAGCTC<br>ATGGTTTTCCCATCCATTCCGG        |
| <i>EVM0024406</i> | SK vector construction (RP) | TTCCTGCAGCCCCGGGGGATCCTTA<br>CAAAAGATGGCTGGCGGAAG      |
| <i>EVM0012621</i> | SK vector construction (FP) | AGGACAGCCCAAGCTGAGCTC<br>ATGGGTCTCACTTCTCTGCAAG        |
| <i>EVM0012621</i> | SK vector construction (RP) | TTCCTGCAGCCCCGGGGGATCC<br>TTAGACTAATGGGTTTGTGTGG       |

**Table S2. Primers used for real-time PCR analysis.**

| Gene              | Methods used | Primer (5'-3')       |
|-------------------|--------------|----------------------|
| <i>EVM0010227</i> | Q-PCR (FP)   | GAAATGATCAGTATTGGAGT |
| <i>EVM0010227</i> | Q-PCR (RP)   | AATTAAGGTCACACTACCAG |
| <i>EVM0012621</i> | Q-PCR (FP)   | AAAGACTCTTTTGGGTACAT |

|                          |            |                       |
|--------------------------|------------|-----------------------|
| <b><i>EVM0012621</i></b> | Q-PCR (RP) | TAGCTAGGTTTCTTGATGAT  |
| <b><i>EVM0031008</i></b> | Q-PCR (FP) | GACCTCAGCGTCGGCATTAT  |
| <b><i>EVM0031008</i></b> | Q-PCR (RP) | GGTCAGCGGATGAGGATGTC  |
| <b><i>EVM0019215</i></b> | Q-PCR (FP) | TACAGCAGCCGAACCATCAA  |
| <b><i>EVM0019215</i></b> | Q-PCR (RP) | ACCTGCCTCCGGTTGAGGTA  |
| <b><i>EVM0018174</i></b> | Q-PCR (FP) | GCTGCAGGAGGTACTGGACT  |
| <b><i>EVM0018174</i></b> | Q-PCR (RP) | TGTCCCAGCAGGACTACTTG  |
| <b><i>EVM0018852</i></b> | Q-PCR (FP) | ATCTTGCTATTTCCACACCT  |
| <b><i>EVM0018852</i></b> | Q-PCR (RP) | TAACATTGAAGAAGATGGTG  |
| <b><i>EVM0006513</i></b> | Q-PCR (FP) | TTCCACAGCCACCATTAACC  |
| <b><i>EVM0006513</i></b> | Q-PCR (RP) | TAGTCCAGTACCGGCGGCAA  |
| <b><i>EVM0023131</i></b> | Q-PCR (FP) | AGGTATTTTTTGCAAGACCTG |
| <b><i>EVM0023131</i></b> | Q-PCR (RP) | GAGCAACAGACAGATTACCA  |
| <b><i>EVM0003933</i></b> | Q-PCR (FP) | GATCATCATAAAGCCTAAAC  |
| <b><i>EVM0003933</i></b> | Q-PCR (RP) | AAATGCAGAGACATACACAC  |
| <b><i>EVM0006830</i></b> | Q-PCR (FP) | TCATATCTCTGAAACCTCTC  |
| <b><i>EVM0006830</i></b> | Q-PCR (RP) | TCCCGTTCTCAGTACATAAT  |
| <b><i>EVM0011284</i></b> | Q-PCR (FP) | AGAAAGCAGTCAAATCCGGC  |
| <b><i>EVM0011284</i></b> | Q-PCR (RP) | TGATGTTCGGTTGCTGGGAT  |
| <b><i>EVM0030794</i></b> | Q-PCR (FP) | CTGCAAGGCGTTCATCAAGA  |
| <b><i>EVM0030794</i></b> | Q-PCR (RP) | ATGATCCTCCACCCAGCATC  |
| <b><i>EVM0010646</i></b> | Q-PCR (FP) | GAGAATGGTGGAGGGATGGT  |
| <b><i>EVM0010646</i></b> | Q-PCR (RP) | CCAGATGAATTCCCTTGTCCT |
| <b><i>EVM0024406</i></b> | Q-PCR (FP) | CTTCGGGTCAGCTTGATCA   |
| <b><i>EVM0024406</i></b> | Q-PCR (RP) | TTACAAAAGATGGCTGGCGG  |

|                          |            |                       |
|--------------------------|------------|-----------------------|
| <b><i>EVM0032109</i></b> | Q-PCR (FP) | GGAAGTGGTGGGTATGGGAA  |
| <b><i>EVM0032109</i></b> | Q-PCR (RP) | ACGAATCAGGTCCTTGCTGA  |
| <b><i>EVM0024362</i></b> | Q-PCR (FP) | TGGAAACTTGGGGCATTGG   |
| <b><i>EVM0024362</i></b> | Q-PCR (RP) | TCCGCCAATCTCTCCATCTC  |
| <b><i>EVM0012375</i></b> | Q-PCR (FP) | ATTGAGGAAGGACAGTGCA   |
| <b><i>EVM0012375</i></b> | Q-PCR (RP) | CGCTGTACTGGTTCAAGTCG  |
| <b><i>EVM0025419</i></b> | Q-PCR (FP) | AGGAGGCGAAAATGGAGGAA  |
| <b><i>EVM0025419</i></b> | Q-PCR (RP) | TCAGAGAAGGGACAGAAGGC  |
| <b><i>EVM0019694</i></b> | Q-PCR (FP) | CTGATCCTGCAAATTGGCCA  |
| <b><i>EVM0019694</i></b> | Q-PCR (RP) | TGATCGAACCAGCTCCAAC   |
| <b><i>EVM0017946</i></b> | Q-PCR (FP) | AAGAGCCACCAGAGCCTAAG  |
| <b><i>EVM0017946</i></b> | Q-PCR (RP) | TTTTCGTCACCCTTCGCTTG  |
| <b><i>EVM0021130</i></b> | Q-PCR (FP) | GGGAGCTGTGTTTGGATTCC  |
| <b><i>EVM0021130</i></b> | Q-PCR (RP) | GTATCTTCGCTCGTCACCCT  |
| <b><i>EVM0003048</i></b> | Q-PCR (FP) | CAAGGGCTTCCAATCCAAGG  |
| <b><i>EVM0003048</i></b> | Q-PCR (RP) | GGCCCTTTCCTGAAAAGTGA  |
| <b><i>EVM0014393</i></b> | Q-PCR (FP) | ATGGTGGTGTTCAGAGGGT   |
| <b><i>EVM0014393</i></b> | Q-PCR (RP) | CCCAGCATTCCAGTCCAGTA  |
| <b><i>EVM0009852</i></b> | Q-PCR (FP) | AGTGGACATGGCAAGCTACT  |
| <b><i>EVM0009852</i></b> | Q-PCR (RP) | ACCTCAGTATCATCCCAAGGC |
| <b><i>EVM0028901</i></b> | Q-PCR (FP) | AAGAGAAAGCTGGAATAATG  |
| <b><i>EVM0028901</i></b> | Q-PCR (RP) | CCAAAAAAGGGATTTAAGTT  |
| <b><i>EVM0011028</i></b> | Q-PCR (FP) | GAGACTGCTCGGCTGAAGAT  |
| <b><i>EVM0011028</i></b> | Q-PCR (RP) | GCTTCCGAATTTTCAGAAGA  |
| <b><i>EVM0026245</i></b> | Q-PCR (FP) | ATGGCGGATGTTGAAGATGG  |

|                   |            |                      |
|-------------------|------------|----------------------|
| <i>EVM0026245</i> | Q-PCR (RP) | CAAAACTTGGTTTCCATGCT |
|-------------------|------------|----------------------|

**Table S3. Primers used for pGEX-4T-1 vector construction.**

| Gene              | Methods used                       | Primer (5'-3')                                         |
|-------------------|------------------------------------|--------------------------------------------------------|
| <i>EVM0011284</i> | pGEX-4T-1 vector construction (FP) | GGATCTGGTTCCGCGTGGATCCATGG<br>TTTTTTCATCCATTCCAGCTTATC |
| <i>EVM0011284</i> | pGEX-4T-1 vector construction (RP) | CGATGCGGCCGCTCGAGTCGACTCAT<br>AAGGGAGTACTAGTGGAAGAAGAG |
| <i>EVM0024406</i> | pGEX-4T-1 vector construction (FP) | GGATCTGGTTCCGCGTGGATCCATGG<br>TTTTCCCATCCATTCCGGTCTATC |
| <i>EVM0024406</i> | pGEX-4T-1 vector construction (RP) | CGATGCGGCCGCTCGAGTCGACTTAC<br>AAAAGATGGCTGGCGGAAGAAGAA |

**Table S4. Sequences of the probes used for EMSA.**

| Promoter      | Position | Sequence (5'-3')                                       |
|---------------|----------|--------------------------------------------------------|
| <i>DkADH1</i> | P1       | ACAAGAAAT <u>TAAAG</u> TTTAGTGATTAAA                   |
| <i>DkADH1</i> | P2       | GTAGGCACACATCTTTACTTTTCCTTCCTCTGT                      |
| <i>DkADH1</i> | P3       | TTAGATTAACCTTTTAATTAGAATGATAATT                        |
| <i>DkADH1</i> | P4       | TACTCCAAC <u>TTT</u> ACTCTCCCCTCTTTATCTTCC             |
| <i>DkADH1</i> | P5       | TATTATATA <u>TAAAG</u> AAAGTTCTGAGGAAAAAGAAAA<br>TTAAG |
| <i>DkPDC2</i> | P1       | AGGTGTACTTATA <u>AAAAG</u> AGTCTGGAATGAT               |
| <i>DkPDC2</i> | P2       | ATAAGTTAAAT <u>TAAAG</u> AATTATACTATGAAG               |
| <i>DkPDC2</i> | P3       | AAATATTATATTGT <u>TAAAG</u> CAATGTAATAAATTA<br>G       |
